# Supplementary material for: Pathfinder-Driven Chemical Space Exploration and Multiparameter Optimization in Tandem with Glide/IFD and QSAR-Based Active Learning Approach to Prioritize Design Ideas for FEP+ Calculations of SARS-CoV-2 PLpro Inhibitors
Source: Molecules. 2022 Dec 5;27(23):8569. doi: 10.3390/molecules27238569 (PMC9741453; doi:10.3390/molecules27238569)

# Pathfinder-driven chemical space exploration and multiparameter optimization in tandem with Glide/IFD and QSAR-based active learning approach to prioritize design ideas for FEP+ calculations of SARS-COV-2 PL<sup>pro</sup> inhibitors

N.J. Gumede\*

Department of Chemistry, Mangosuthu University of Technology, PO Box 12363, Jacobs, 4026, South Africa.

## Corresponding Author

\*E-mail: ngumede@mut.ac.za

## Supplementary Materials

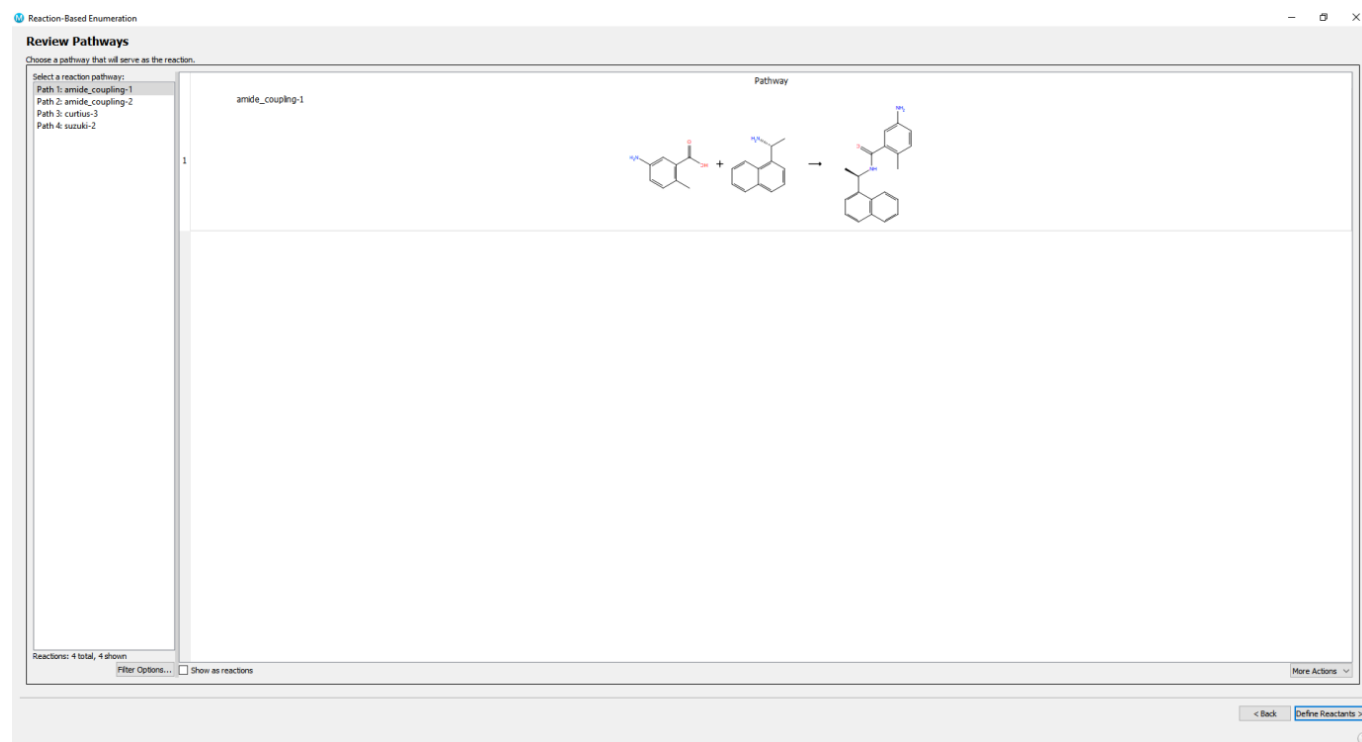

**Figure S1.** Reaction based enumeration generated pathway for GRL-0617.

(a)

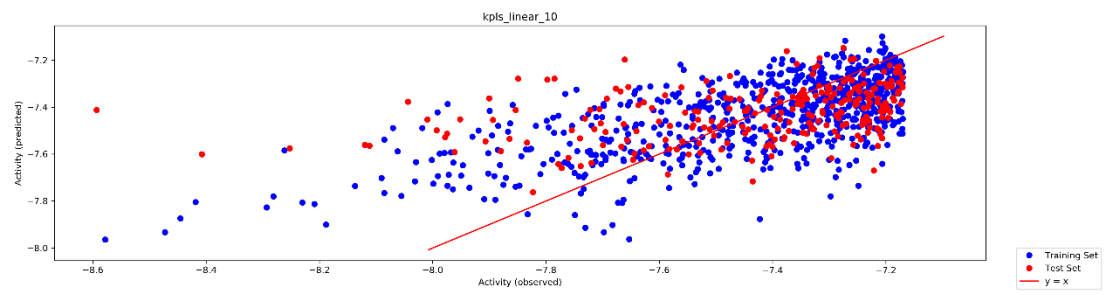

(b)

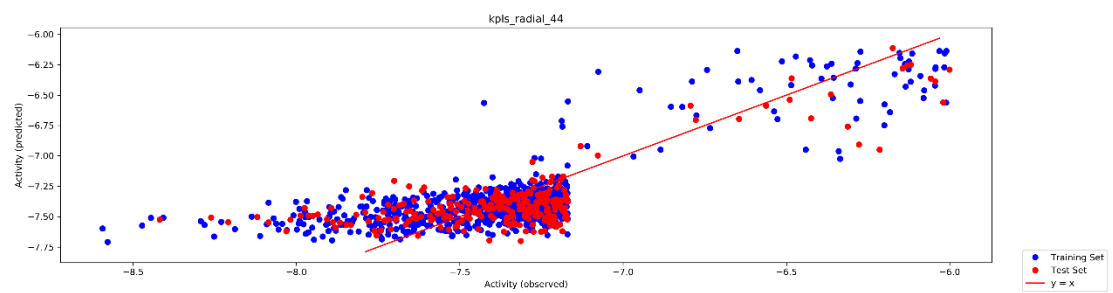

(c)

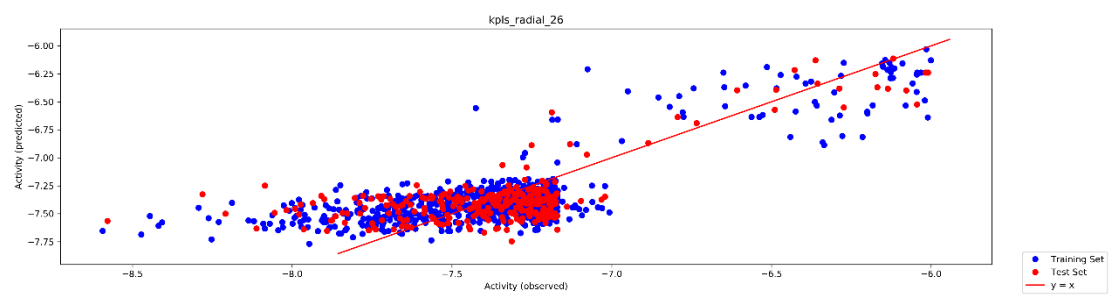

(d)

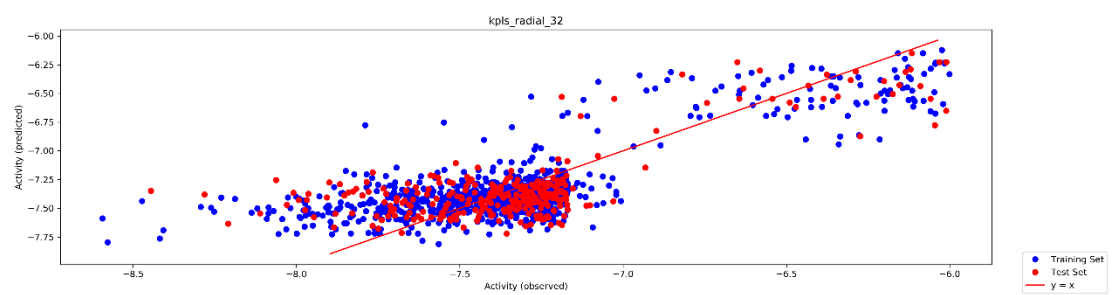

(e)

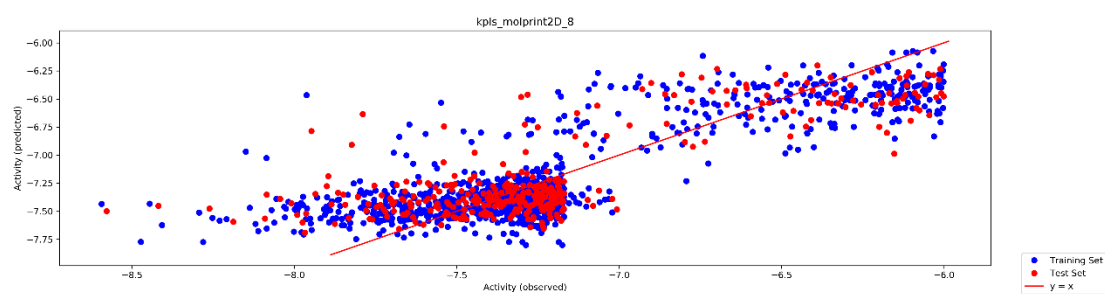

(f)

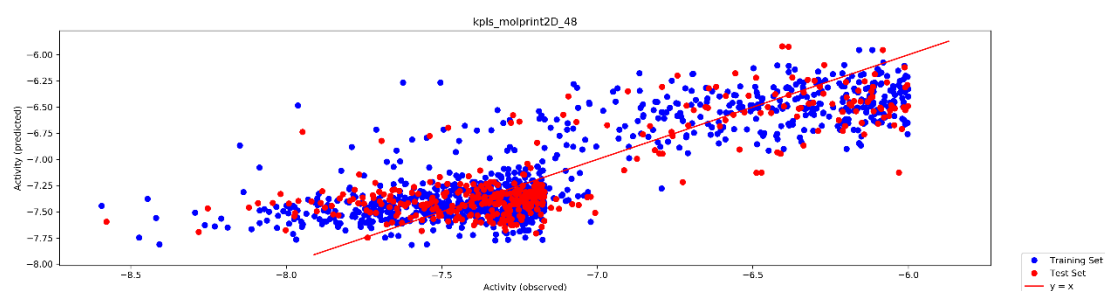

(g)

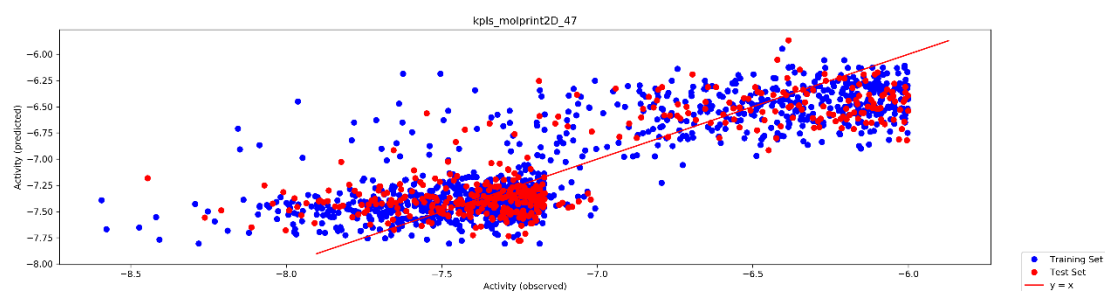

(h)

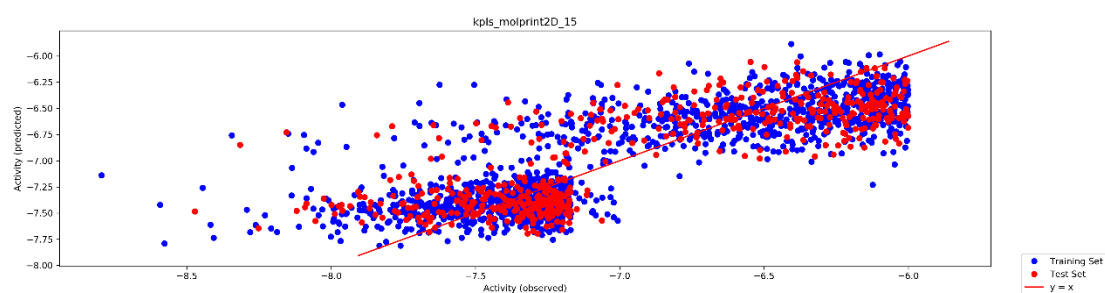

**Figure S2.** Plot of Active learning Glide SP and Auto QSAR models to predict the binding affinities of enumerated compounds **(a)** Auto QSAR\_model\_1 with an  $R^2$  of 0.4310 and a  $Q^2$  of 0.1571 **(b)** Auto QSAR\_model\_2 with an  $R^2$  of 0.6262 and a  $Q^2$  of 0.5929 **(c)** Auto QSAR\_model\_3 with an  $R^2$  of 0.6090 and a  $Q^2$  of 0.5630 **(d)** Auto QSAR\_model\_4 with an  $R^2$  of 0.6227 and a  $Q^2$  of 0.5793 **(e)** Auto QSAR\_model\_5 with an  $R^2$  of 0.6980 and a  $Q^2$  of 0.6450 **(f)** Auto QSAR\_model\_6 with an  $R^2$  of 0.7084 and a  $Q^2$  of 0.6676 **(g)** Auto QSAR\_model\_7 with an  $R^2$  of 0.7086 and a  $Q^2$  of 0.6910 **(h)** Auto QSAR\_model\_9 with an  $R^2$  of 0.6718 and a  $Q^2$  of 0.6476.

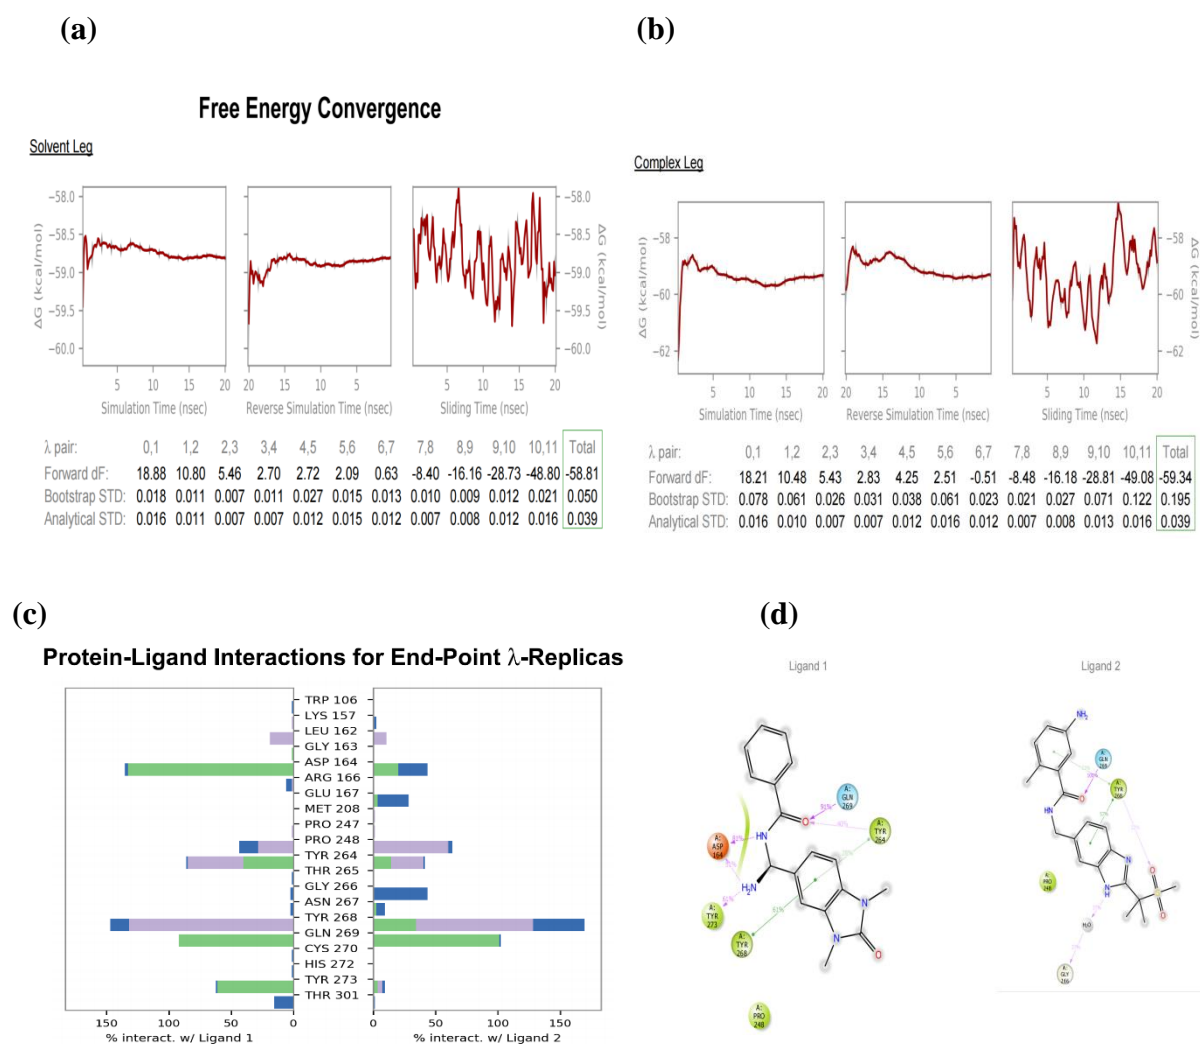

**Figure S3.** FEP+ simulation results for relative binding affinity prediction for the perturbation cycle of compound 5 (ligand 1) and compound 45 (ligand 2). **(a)** Free energy convergence of the perturbation cycle in solvent leg. **(b)** Free energy convergence of the perturbation cycle in complex leg. **(c)** Histogram depicting protein-ligand interactions for endpoint  $\lambda$ -replicas. **(d)** Ligand interaction diagram detailing the type of interactions observed between the two ligands and the receptor.

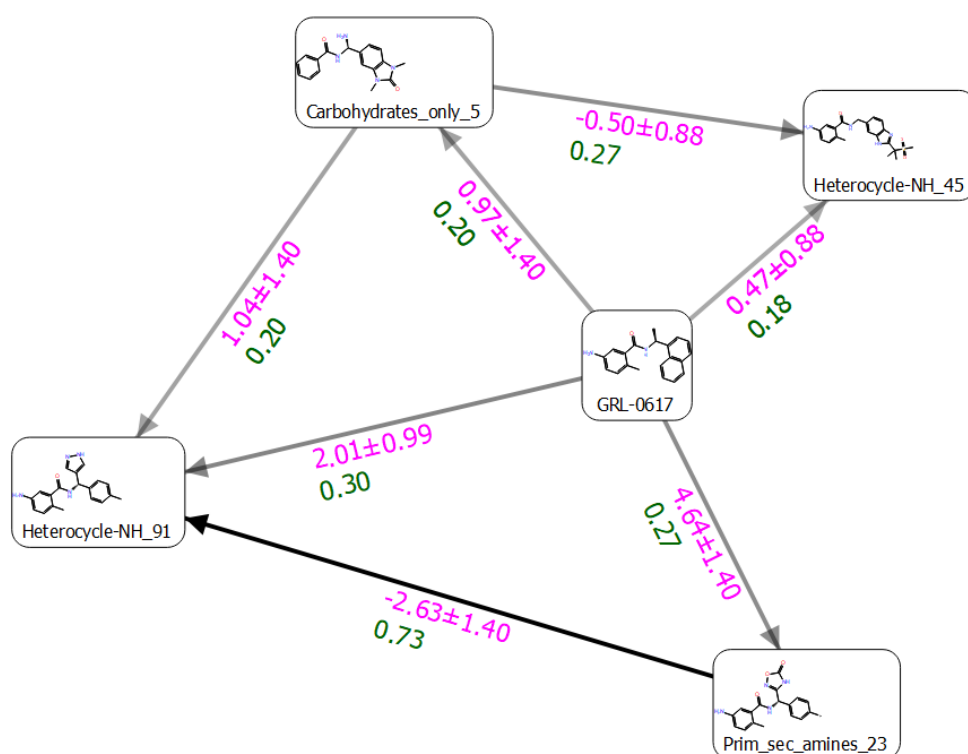

**Figure S4.** A circle closure perturbation map of design ideas and GRL-0617 detailing the difference in binding free energy,  $\Delta\Delta G$  (pink) and its associated error estimate between two ligands in an edge/node, as well as their associated ligand similarities scores (green).

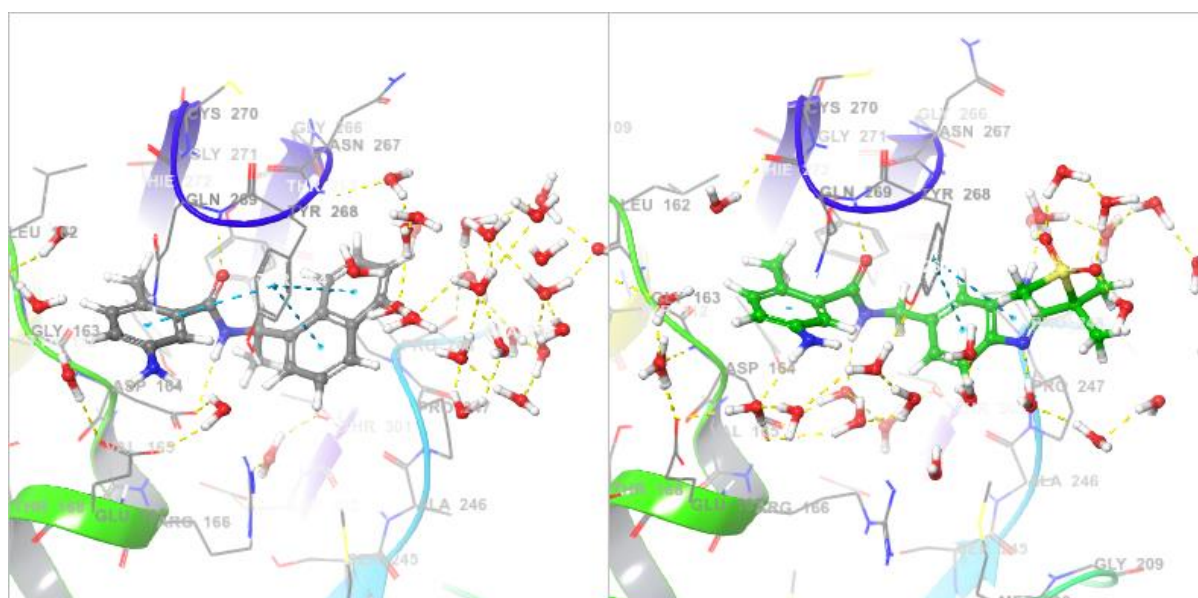

**Figure S5.** FEP+ node representation for GRL-0617 (grey carbons) on the left and compound 45 (green carbons) on the right frame in the active site cavity of PL<sup>Pro</sup> with favourable and unfavourable waters shown.

**Table S1.** Relative binding affinity prediction and its associated predicted error in kcal/mol of the design ideas and GRL-0617 as a reference compound against SARS-COV-2 PLpro using FEP+.

| No. | Ligand                        | Estimated $\Delta G$                                                                | Pred. $\Delta G$<br>kcal/mol | Pred. Error<br>kcal/mol | Exp. $\Delta G$<br>kcal/mol | Exp. Error | Structure                                                                             |
|-----|-------------------------------|-------------------------------------------------------------------------------------|------------------------------|-------------------------|-----------------------------|------------|---------------------------------------------------------------------------------------|
| 1   | Primary & secondary amines_23 | 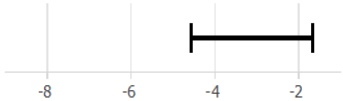   | -3,11                        | 1,45                    | N/A                         | N/A        | 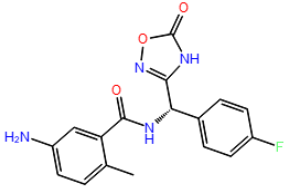   |
| 2   | Carboxylates_only_5           | 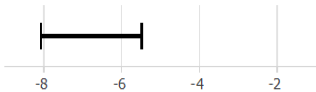   | -6,78                        | 1,30                    | N/A                         | N/A        | 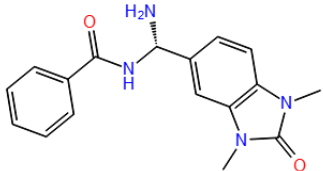   |
| 3   | N-Heterocycles_91             | 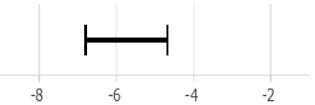 | -5,74                        | 1,06                    | N/A                         | N/A        | 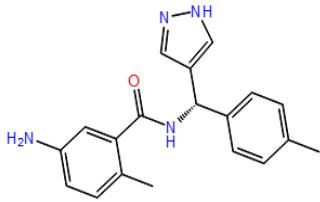 |

4

GRL-0617

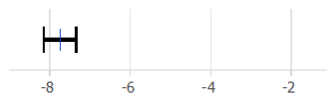

-7,75

0,40

-7,75

0

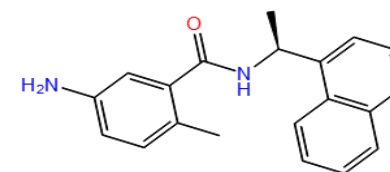

5

N-Heterocycles\_45

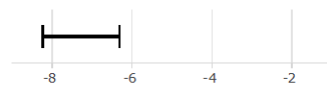

-7,28

0,96

N/A

N/A

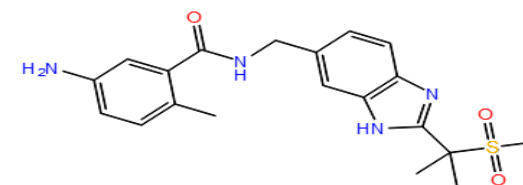

Supplement: Supplementary file 1 [file molecules-27-08569-s001.zip › molecules-2031413-supplementary.pdf]
